# Supplementary material
Source: Royal Society of Chemistry journal article supplement (doi:10.1039/d6ay00438e)

## Supplementary Information

### Iodine-starch reaction renewed: Determination of iodate in table salts via the Lab-In-Syringe technique

Cemre Yıldız<sup>1</sup>, Ivana H. Šrámková<sup>1</sup>, Sercan Yıldırım<sup>2</sup>, Petr Solich<sup>1</sup>, Burkhard Horstkotte<sup>1,\*</sup>

5

<sup>1</sup> Department of Analytical Chemistry, Faculty of Pharmacy in Hradec Králové, Charles University, Heyrovského 1203, Hradec Králové, 500 03, Czech Republic

<sup>2</sup> Karadeniz Technical University, Faculty of Pharmacy, Department of Analytical Chemistry, Farabi Street, 61080, Trabzon, Turkey

10

#### Content

|                                                                                        |   |
|----------------------------------------------------------------------------------------|---|
| Figure S-1: Effect of cleaning mode on carry over and repeatability                    | 2 |
| Figure S-2. Evaluation of potential interferents of the optimized method for solutions | 3 |
| 15 Figure S-3. Exemplary calibration of the developed LIS methodology for iodate       | 4 |
| Table S-1: Analytical protocol for LIS-automated determination of iodate               | 5 |
| Table S-2: Cleaning protocol                                                           | 5 |
| Table S-3: Greenness evaluation according to AGREE                                     | 6 |

20

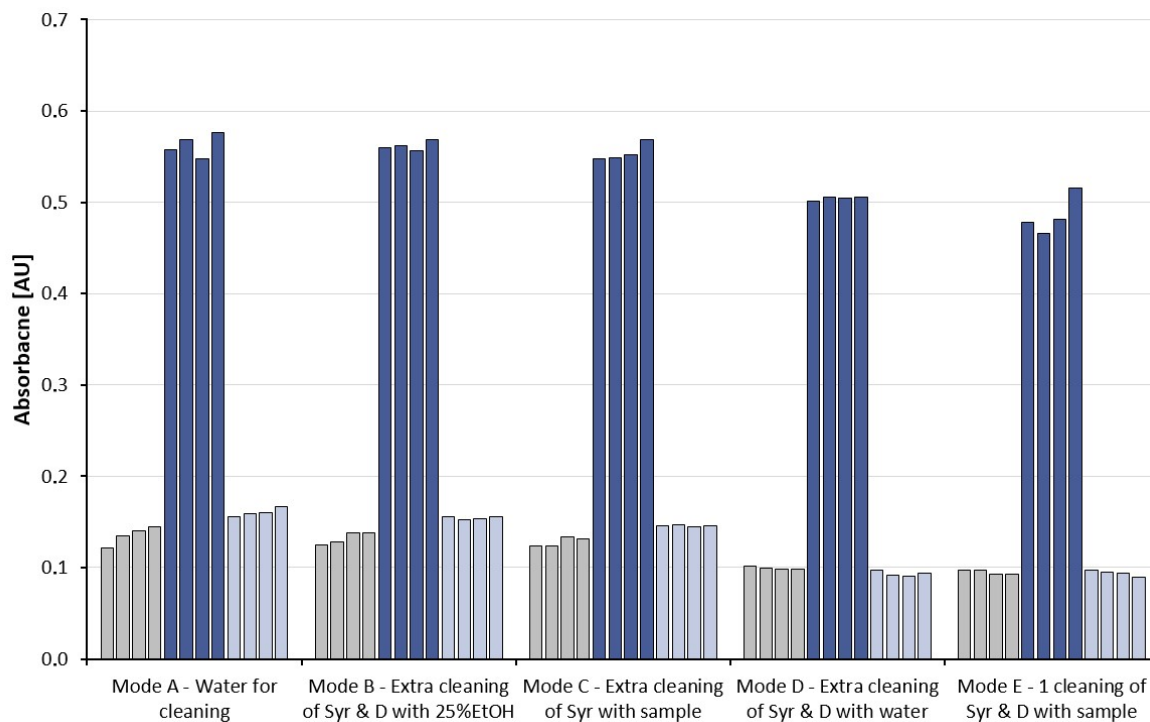

**Figure S-1: Effect of cleaning mode on carry over and repeatability evaluated by measuring four times standard solutions prepared with 4 g L<sup>-1</sup> NaCl containing 2 µmol L<sup>-1</sup> (grey), 8 µmol L<sup>-1</sup> (dark blue), and again 2 µmol L<sup>-1</sup> (light blue) iodate. Syr – syringe, D – detection cell.**

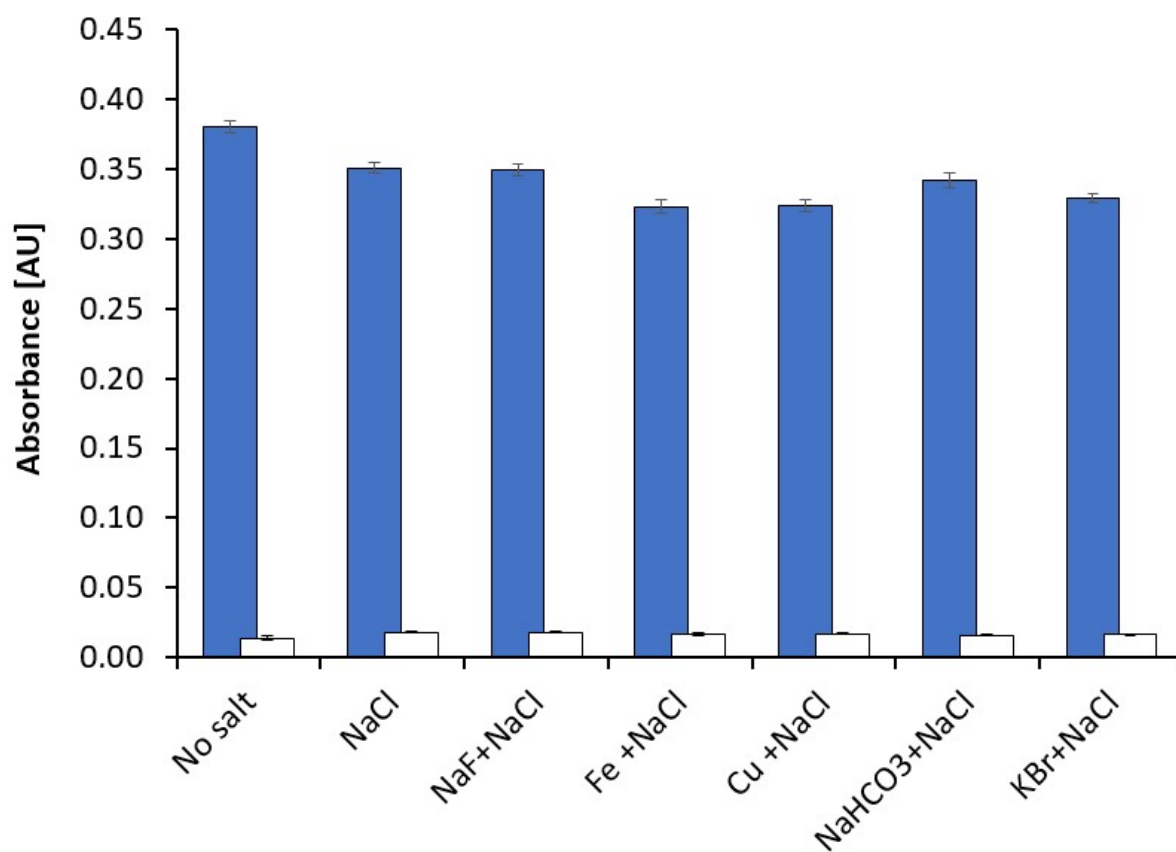

Figure S-2. Evaluation of potential interferences of the optimized method for solutions spiked (blue) with iodate and without iodate (white). Concentrations as given in Table 1.

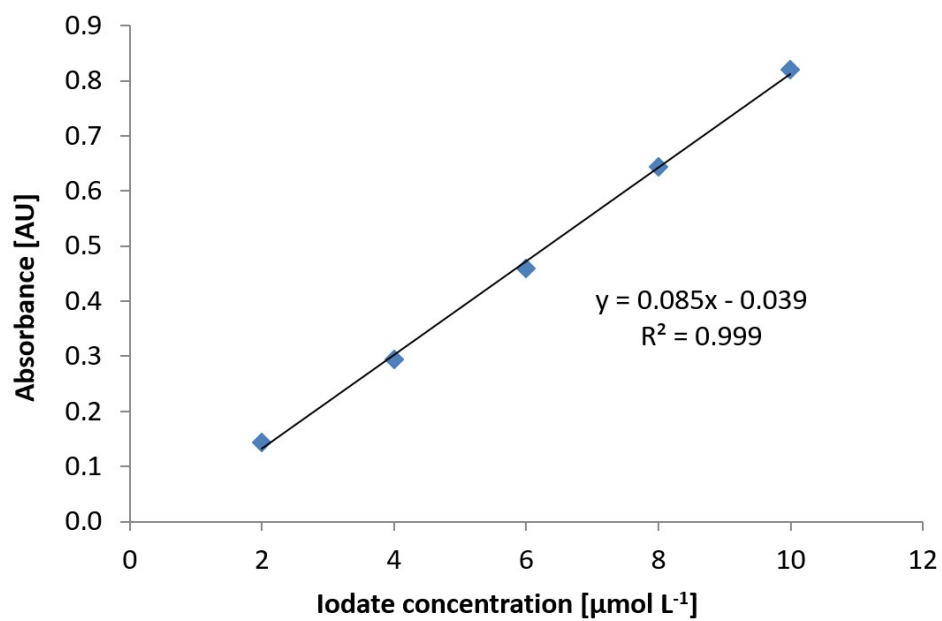

30

**Figure S-3. Exemplary calibration of the developed Lab-In-Syringe methodology for iodate. Conditions: 1 mL iodate standard, 125  $\mu\text{L}$  acidic buffer 500  $\text{mmol L}^{-1}$ , pH 0.9, 200  $\mu\text{L}$  iodide 10  $\text{mmol L}^{-1}$ , and 100  $\mu\text{L}$  starch solution 0.4 % (w/v), reaction time of 100 s.**

35 **Table S-1: Analytical protocol for LIS-automated determination of iodate by iodine-starch reaction.**

| Step | Instruction                                                                                                                                                              | Comment                                                                                                                                                             |
|------|--------------------------------------------------------------------------------------------------------------------------------------------------------------------------|---------------------------------------------------------------------------------------------------------------------------------------------------------------------|
| 1    | Aspirate 200 $\mu\text{L}$ at 250 $\mu\text{L s}^{-1}$ from HV position 8                                                                                                | Aspirate Air                                                                                                                                                        |
| 2    | Aspirate 1000 $\mu\text{L}$ from HV position 1 (autosampler)<br>(during method optimization from position 1 or 2 for sample or standard, respectively)<br>Delay (sec) 2  | Aspirate Standard or Sample                                                                                                                                         |
| 3    | Contact Closure On                                                                                                                                                       | Stirring on                                                                                                                                                         |
| 4    | Aspirate 100 $\mu\text{L}$ at 50 $\mu\text{L s}^{-1}$ from HV position 4<br>Delay (sec) 3                                                                                | Aspiration of starch solution                                                                                                                                       |
| 5    | Aspirate 200 $\mu\text{L}$ at 250 $\mu\text{L s}^{-1}$ from HV position 5<br>Delay (sec) 1                                                                               | Aspiration of potassium iodide solution                                                                                                                             |
| 6    | Aspirate 125 $\mu\text{L}$ at 250 $\mu\text{L s}^{-1}$ from HV position 6<br>Delay (sec) 3                                                                               | Aspiration of $\text{H}_2\text{SO}_4$ buffer<br>(later, combined starch and acidic buffer solution = 225 $\mu\text{L}$ omitting step 4)                             |
| 7    | Aspirate 50 $\mu\text{L}$ at 250 $\mu\text{L s}^{-1}$ from HV position 8                                                                                                 | Aspirate Air to drive all solution into the syringe                                                                                                                 |
| 8    | Delay (sec) 100                                                                                                                                                          | Reaction time                                                                                                                                                       |
| 9    | Contact Closure Off<br>Delay (sec) 2                                                                                                                                     | Stirring off                                                                                                                                                        |
| 10   | Empty pump at 100 $\mu\text{L s}^{-1}$ to HV position 9<br>Delay (sec) 5<br>Start spectrophotometric measurement<br>Delay (sec) 7<br>Stop spectrophotometric measurement | Emptying syringe to detection cell and measuring after 5 s<br>(to fill the cell) for 7 s<br>(time to pass solution through cell) the absorbance for later averaging |

HV: head valve of the syringe pump

**Table S-2: Cleaning protocol, here with water.**

| Step | Instruction                                                                                     | Comment                                                           |
|------|-------------------------------------------------------------------------------------------------|-------------------------------------------------------------------|
| 1    | Contact Closure On<br>Aspirate 800 $\mu\text{L}$ at 250 $\mu\text{L s}^{-1}$ from HV position 7 | Partially filling the syringe pump with water while stirring      |
| 2    | Aspirate 500 $\mu\text{L}$ at 250 $\mu\text{L s}^{-1}$ from HV position 8                       | Aspiration of air                                                 |
| 3    | Contact Closure Off<br>Empty syringe at 250 $\mu\text{L s}^{-1}$ to HV position 9               | Deactivation of in-syringe stirring and emptying syringe to Waste |

40 **Table S-3: Greenness evaluation according to AGREE\***

1. Off-line analysis  
(generally imperative for a solid sample, therefore a factor weight reduction to 1)
2. 1 g for preparation of 20 mL sample solution
3. On-line placement of analytical device (reaction preparation and detection in one system)
- 45 4. Three or fewer preparation steps
5. Automated approach, sample preparation not needed else than dissolution
6. Sulfuric acid and potassium iodide in very small quantities (miniaturized procedure),  
therefore, factor weight reduction to 1
7. Waste ca 4 mL, mostly water
- 50 8. 1 analyte analyzed per time, 13/h, increasable to 20 h<sup>-1</sup>
9. No energy-intensive detection techniques used, power consumption < 10 Wh per analysis
10. Some reagents are biobased (starch)
11. Toxic reagents used in smallest quantities (H<sub>2</sub>SO<sub>4</sub>, potassium iodide, < 0.04 g per analysis)
12. No environmental threats by reaction waste nor for operator's safety
- 55 (automated, capsuled) apart from diluted acid (corrosive)

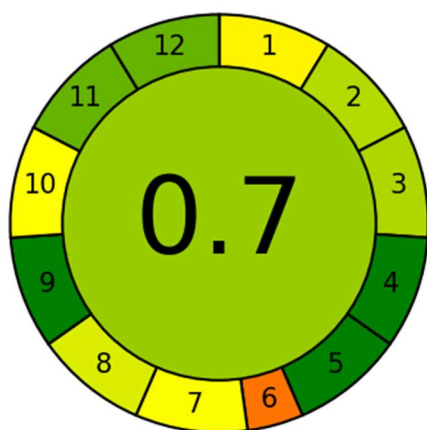

Supplement: d6ay00438e1.pdf [file d6ay00438e1.pdf]
